# Supplementary material for: Vector-Enabled Metagenomic (VEM) Surveys Using Whiteflies (Aleyrodidae) Reveal Novel Begomovirus Species in the New and Old Worlds
Source: MDPI journal article supplement (doi:10.3390/v7102895), 2015-10-26
Supplement: s1 [file s1]

**Supplemental Table S1.** Genomic features of begomoviruses detected in whiteflies.

| Genome <sup>a</sup>                                                         | Genome Size | CP motif <sup>b</sup> | DNA-B MP motif <sup>c</sup> | CR (length/% identity) <sup>d</sup> |
|-----------------------------------------------------------------------------|-------------|-----------------------|-----------------------------|-------------------------------------|
| VEM Squash leaf curl virus DNA-A [California squash 2012 Contig 2]          | 2638        | SWRLMAGT              |                             | 228/95%                             |
| VEM Squash leaf curl virus DNA-B [California squash 2012 Contig 1]          | 2641        |                       | RCNIDLHY                    |                                     |
| VEM Melon chlorotic leaf curl virus DNA-A [Guatemala squash 2012 Contig 6]  | 2662        | PWRLLAGT              |                             | 198/93%                             |
| VEM Melon chlorotic leaf curl virus DNA-B [Guatemala squash 2012 Contig 13] | 2630        |                       | RCNIDLHY                    |                                     |
| VEM Tomato severe leaf curl virus DNA-A [Guatemala squash 2012 Contig 17]   | 2593        | PWRLMAGT              |                             |                                     |
| VEM Sida golden mosaic Honduras virus 1a DNA-A [Guatemala squash 2012]      | 2608        | PWRAMPGI              |                             | 160/87%                             |
| VEM Sida golden mosaic Honduras virus 1b DNA-A [Guatemala squash 2012]      | 2608        | PWRAMPGT              |                             |                                     |
| VEM Sida golden mosaic Honduras virus 1 DNA-B [Guatemala squash 2012]       | 2557        |                       | RCNIDLHY                    |                                     |
| VEM begomovirus 1a DNA-A [Guatemala squash 2012]                            | 2610        | PWRLVETL              |                             |                                     |
| VEM begomovirus 1b DNA-A [Guatemala squash 2012]                            | 2610        | PWRLVETL              |                             |                                     |
| VEM begomovirus 1c DNA-A [Guatemala squash 2012]                            | 2609        | PWRLVETL              |                             |                                     |
| VEM begomovirus 2 DNA-A [Guatemala squash 2012]                             | 2590        | PWRPMAGT              |                             |                                     |
| VEM begomovirus 3a DNA-A [Guatemala squash 2012]                            | 2629        | PWRTMAGT              |                             | 223/99%                             |
| VEM begomovirus 3b DNA-A [Guatemala squash 2012]                            | 2628        | PWRTMAGT              |                             |                                     |
| VEM begomovirus 3a DNA-B [Guatemala squash 2012]                            | 2580        |                       | RCNIDLHY                    |                                     |
| VEM begomovirus 3b DNA-B [Guatemala squash 2012]                            | 2580        |                       | RCNIDLHY                    |                                     |
| VEM begomovirus 4 DNA-A [Guatemala squash 2012]                             | 2608        | SWRLMAGT              |                             |                                     |
| VEM Tomato severe leaf curl virus DNA-A [Guatemala tomato 2012 Contig 1]    | 2593        | PWRLMAGT              |                             |                                     |
| VEM Tomato mosaic Havana virus DNA-A [Guatemala tomato 2012 Contig 18]      | 2619        | PWRTMAVT              |                             | 184/96%                             |
| VEM Tomato mosaic Havana virus DNA-B [Guatemala tomato 2012 Contig 12]      | 2606        |                       | RCNIDLHY                    |                                     |
| VEM Squash leaf curl virus DNA-A [Israel squash 2011]                       | 2637        | PWRLMAGT              |                             | 228/95%                             |
| VEM Squash leaf curl virus DNA-B [Israel squash 2011 Contig 1]              | 2608        |                       | RCNIDLHY                    |                                     |
| VEM Cotton leaf curl Gezira virus DNA-A [Israel squash 2011]                | 2758        |                       |                             |                                     |
| VEM Sweet potato leaf curl virus [Puerto Rico tomato 2010]                  | 2804        |                       |                             |                                     |
| VEM begomovirus 5a DNA-A [Puerto Rico tomato 2010]                          | 2606        | SWRSMAGT              |                             | 150/98%                             |
| VEM begomovirus 5b DNA-A [Puerto Rico tomato 2010]                          | 2606        | SWRSMAGT              |                             |                                     |
| VEM begomovirus 5c DNA-A [Puerto Rico tomato 2010]                          | 2607        | SWRSLAGT              |                             |                                     |
| VEM begomovirus 5d DNA-A [Puerto Rico tomato 2010]                          | 2607        | SWRSLAGT              |                             |                                     |
| VEM begomovirus 5e DNA-A [Puerto Rico tomato 2010]                          | 2606        | SWRSMAGT              |                             |                                     |
| VEM begomovirus 5 DNA-B [Puerto Rico tomato 2010]                           | 2586        |                       | RCNIDLHY                    |                                     |
| VEM begomovirus 6b DNA-B [Puerto Rico tomato 2010]                          | 2574        |                       | RCNIDLHY                    |                                     |
| VEM begomovirus 6 DNA-A [Puerto Rico pumpkin 2010]                          | 2638        | PWRSMAGP              |                             | 162/88%                             |
| VEM begomovirus 6a DNA-B [Puerto Rico pumpkin 2010]                         | 2572        |                       | RCNIDLHY                    |                                     |

| <b>Genome<sup>a</sup></b>                                                           | <b>Genome Size</b> | <b>CP motif<sup>b</sup></b> | <b>DNA-B MP motif<sup>c</sup></b> | <b>CR (length/ % identity)<sup>d</sup></b> |
|-------------------------------------------------------------------------------------|--------------------|-----------------------------|-----------------------------------|--------------------------------------------|
| VEM Sweet potato leaf curl virus [Puerto Rico pumpkin 2010]                         | 2788               |                             |                                   |                                            |
| VEM Macrottilium mosaic Puerto Rico virus DNA-A [Puerto Rico pumpkin 2010 Contig 5] | 2616               | PWRSSAGT                    |                                   | 160/94%                                    |
| VEM Macrottilium mosaic Puerto Rico virus DNA-B [Puerto Rico pumpkin 2010 Contig 1] | 2570               |                             | RCNIDLHY                          |                                            |
| VEM begomovirus 5f DNA-A [Puerto Rico eggplant 2010]                                | 2607               | SWRSLAGT                    |                                   |                                            |
| VEM Sweet potato leaf curl virus [Puerto Rico eggplant 2010]                        | 2823               |                             |                                   |                                            |
| VEM Sweet potato leaf curl virus [Spain bean 2011]                                  | 2829               |                             |                                   |                                            |
| VEM Sweet potato leaf curl virus [Spain squash 2011]                                | 2765               |                             |                                   |                                            |
| VEM begomovirus 7a [Spain tomato 2011]                                              | 2769               |                             |                                   |                                            |
| VEM begomovirus 7b [Spain tomato 2011]                                              | 2767               |                             |                                   |                                            |
| VEM begomovirus 7c [Spain tomato 2011]                                              | 2767               |                             |                                   |                                            |
| VEM begomovirus 7d [Spain tomato 2011]                                              | 2767               |                             |                                   |                                            |
| VEM begomovirus 7e [Spain tomato 2011]                                              | 2767               |                             |                                   |                                            |
| VEM begomovirus 7f [Spain tomato 2011]                                              | 2780               |                             |                                   |                                            |
| VEM begomovirus 7g [Spain tomato 2011]                                              | 2780               |                             |                                   |                                            |
| VEM begomovirus 7h [Spain weed 2011]                                                | 2769               |                             |                                   |                                            |
| VEM begomovirus 7i [Spain weed 2011]                                                | 2769               |                             |                                   |                                            |
| VEM begomovirus 7j [Spain weed 2011]                                                | 2769               |                             |                                   |                                            |
| VEM begomovirus 7k [Spain weed 2011]                                                | 2767               |                             |                                   |                                            |
| VEM Tomato yellow leaf curl virus-[Almeria] 1 [Spain weed 2011 Contig 35]           | 2781               |                             |                                   |                                            |
| VEM Tomato yellow leaf curl virus-[Almeria] 1a [Spain weed 2011 Contig 1]           | 2781               |                             |                                   |                                            |

<sup>a</sup>Novel genomes sharing <91% identity with known begomovirus genomes were named 'VEM begomoviruses'. Genomes that were not PCR-verified include the word 'Contig' within brackets.

<sup>b</sup>Conserved motif found within the N-terminus of capsid proteins (CP) encoded by New World bipartite begomoviruses.

<sup>c</sup>Conserved motif found within the majority of movement proteins (MP) encoded by New World bipartite begomoviruses.

<sup>d</sup>Length and percent identity between the common region (CR) sequences of putative cognate DNA-A and DNA-B components of bipartite begomoviruses.
