# Supplementary material for: Vector-Enabled Metagenomic (VEM) Surveys Using Whiteflies (Aleyrodidae) Reveal Novel Begomovirus Species in the New and Old Worlds
Source: MDPI journal article supplement (doi:10.3390/v7102895), 2015-10-26
Supplement: s1 [file s1]

**Supplemental File S2.** Sequences used for phylogenetic analysis and genome-wide pairwise comparisons displayed in Figure 2.

>AB014346\_Japan  
>AB014347\_Japan  
>AB110217\_Japan\_Nagasaki\_Omura  
>AB110218\_Japan\_Shizuoka\_Shimizu  
>AB116629\_Japan\_\_Miyazaki\_Miyazaki  
>AB116631\_Japan\_\_Kumamoto\_Misumi  
>AB116632\_Japan\_\_Shizuoka\_Yaizu  
>AB116633\_Japan\_\_Aichi\_Atumi  
>AB116634\_Japan\_\_Mie\_Kisozaki  
>AB116635\_Japan\_\_Shizuoka\_Daito  
>AB116636\_Japan\_\_Shizuoka\_Osuka  
>AB192965\_Japan\_\_Kochi\_Tosa\_Usa  
>AB363566\_Japan\_Okinawa\_Tomigusuku\_Zayasu  
>AB439841\_Japan\_\_Tochigi\_Oyama  
>AB439842\_Japan\_\_Aichi\_Tokai  
>AB613208\_South\_Korea\_Iksan  
>AB613209\_South\_Korea\_Nonsan  
>AB636264\_South\_Korea\_Yesan\_city  
>AB636409\_South\_Korea\_Gangju\_city  
>AB636410\_South\_Korea\_Cheju\_city  
>AB636411\_South\_Korea\_Cheju\_city  
>AB636412\_South\_Korea\_Cheju\_city  
>AB669434\_South\_Korea  
>AB921568\_Japan\_\_Osaka\_Takatsuki  
>AF024715\_Dominican\_Republic  
>AF071228\_Spain  
>AF105975\_Portugal  
>AF271234\_Spain  
>AF350330\_TbLCV\_ZimbabweVirus  
>AJ132711\_Iran  
>AJ223505\_Cuba  
>AJ422132\_SACMV\_Madagascar\_M12  
>AJ489258\_Spain\_Almeria  
>AJ519441\_Spain\_Andalucia  
>AJ519675\_Spain\_Canary\_Islands\_Gran\_Canaria\_Tirajana  
>AJ812277\_Turkey\_Mersin  
>AJ865337\_Reunion  
>AJ865338\_Madagascar\_Morondova\_2001  
>AJ865339\_Madagascar\_Toliary  
>AJ865340\_Mayotte\_Kahani

>AJ865341\_Mayotte\_Dembeni  
>AM282874\_China\_Shanghai  
>AM409201\_Reunion\_SaintGilles\_les\_Hauts  
>AM698117\_China\_Zhejiang\_Province  
>AM698118\_China\_Zhejiang\_Province  
>AM698119\_China\_Zhejiang\_Province  
>AM701759\_Comoros\_Anjouan\_Bambas  
>AM701761\_Comoros\_Grande\_Comore\_Dimadjou  
>AM701763\_Comoros\_Moheli\_Fomboni  
>AM701764\_Madagascar\_Antsiranana\_Namakely  
>AM701766\_Madagascar\_Diana\_Antsalaka  
>AM701767\_Madagascar\_Menabe\_Miandrivazo  
>AY044138\_Sudan  
>AY134494\_Puerto\_Rico  
>AY227892\_Spain  
>AY502934\_Mali  
>AY530931\_USA\_\_Florida  
>AY594174\_Egypt\_\_Ismailia\_Governate  
>DQ127170\_Uganda\_\_Iganga  
>DQ144621\_Italy\_\_Sicily  
>DQ358913\_Ethiopia\_\_Melkassa  
>DQ631892\_Mexico\_\_Culiacan  
>EF051116\_Lebanon  
>EF054893\_Jordan  
>EF054894\_Jordan  
>EF060196\_Morocco\_\_Berkane\_northeast\_region  
>EF110890\_USA\_\_Texas  
>EF110891\_Yemen  
>EF158044\_Jordan  
>EF185318\_Lebanon  
>EF433426\_Jordan  
>EF523478\_Mexico  
>EF539831\_USA\_\_Brawley\_California  
>EU031444\_China\_\_Shanghai  
>EU085423\_Iran\_\_BandarAbbas  
>EU143745\_Jordan\_\_Homrat\_AISahen  
>EU350585\_Ghana\_Akumadan  
>EU635776\_Iran\_\_Kerman\_Kahnooj  
>EU847740\_Ghana\_\_Kumasi  
>FJ355946\_Iran  
>FJ439569\_Netherlands  
>FJ609655\_Mexico\_\_Juan\_Jose\_Rios\_Guasave\_Sinaloa  
>FJ685620\_Togo

>FJ685621\_Nigeria  
>FJ956701\_Oman  
>FJ956702\_Oman  
>FJ956703\_Oman  
>FJ956704\_Oman  
>FJ956705\_Oman  
>FM212660\_Cameroon\_North\_Province  
>FM212661\_Cameroon\_North\_Province  
>FM212662\_Cameroon\_North\_Province  
>FM212663\_Cameroon\_North\_Province  
>FN252890\_China\_Zhejiang\_province  
>FN256256\_China\_Zhejiang\_province  
>FN256257\_China\_Shandong\_province  
>FN256258\_China\_Shanghai  
>FN256259\_China\_Jiangsu\_province  
>FN600540\_Comoros\_Grande\_Comore\_Island\_Foubouni  
>FN650808\_China\_Anhui  
>FR851297\_Grenada\_Hermitage  
>FR873230\_Cameroon\_South\_Western  
>GQ141873\_South\_Korea\_\_Busan  
>GQ352537\_China  
>GQ352538\_China  
>GQ861426\_Jordan  
>GQ861427\_Jordan  
>GU076440\_Iran  
>GU076441\_Iran  
>GU076442\_Iran  
>GU076443\_Iran  
>GU076444\_Iran  
>GU076445\_Iran  
>GU076446\_Iran  
>GU076447\_Iran  
>GU076448\_Iran  
>GU076449\_Iran  
>GU076450\_Iran  
>GU076451\_Iran  
>GU076452\_Iran  
>GU076453\_Iran  
>GU076454\_Iran  
>GU111505\_China  
>GU199587\_China  
>GU322423\_USA\_\_Hawaii  
>GU322424\_USA\_\_Hawaii

>GU325632\_South\_Korea\_\_Jeju\_Island  
>GU325633\_South\_Korea\_\_Jeju\_Island  
>GU325634\_South\_Korea\_\_Boseong  
>GU348995\_China\_\_Hebei  
>GU355941\_Guatemala\_\_Salama\_Valley  
>GU434141\_China\_\_Shanghai\_Minhang  
>GU434142\_China\_\_Anhui\_Province\_Hefei  
>GU434144\_China\_\_Shanghai  
>GU563330\_China\_\_Tianjin  
>GU951436\_China\_\_Baoding\_City  
>GU951437\_China\_\_Handan\_City  
>GU983859\_China\_\_Beijing  
>HE603241\_New\_Caledonia  
>HE603242\_New\_Caledonia  
>HE603243\_New\_Caledonia  
>HE603244\_New\_Caledonia  
>HE603245\_New\_Caledonia  
>HE603246\_New\_Caledonia  
>HE659517\_Cameroon\_South\_WestFontem  
>HE819240\_Oman\_AIKhaburah  
>HE819241\_Oman\_Bidiya  
>HE819242\_Oman\_Nizwa  
>HE819243\_Oman\_Bid\_Bid  
>HE819245\_Oman  
>HM043732\_China\_\_Shouguang\_of\_Shandong\_province  
>HM130913\_South\_Korea\_\_Jeonju  
>HM130914\_South\_Korea\_\_Jeju  
>HM208334\_China\_\_Hebei  
>HM358879\_China\_\_Yinan\_Shandong\_Provinces  
>HM448447\_Mauritius  
>HM459851\_Mexico\_\_Baja\_California\_Sur  
>HM627880\_China\_\_Dezhou\_Shandong  
>HM627881\_China\_\_Dongying\_Shandong  
>HM627882\_China\_\_Heze\_Shandong  
>HM627883\_China\_\_Jinan\_Shandong  
>HM627884\_China\_\_Laiyang\_Shandong  
>HM627885\_China\_\_Zibo\_Shandong  
>HM856873\_South\_Korea  
>HM856909\_South\_Korea\_\_Busan  
>HM856910\_South\_Korea\_\_Buyeo  
>HM856911\_South\_Korea\_\_Goseong  
>HM856912\_South\_Korea\_\_Gunwi  
>HM856913\_South\_Korea\_\_Gwangju

>HM856914\_South\_Korea\_\_Gwangyang  
>HM856915\_South\_Korea\_\_Gyeongju  
>HM856916\_South\_Korea\_\_Iksan  
>HM856917\_South\_Korea\_\_Jangheung  
>HM856918\_South\_Korea\_\_Nonsan  
>HM856919\_South\_Korea\_\_Uiseong  
>HM988987\_USA  
>HQ260984\_South\_Korea\_\_Chang\_won  
>HQ702861\_China\_\_Linzi\_Shandong  
>HQ702862\_China\_\_Shouguang\_Shandong  
>HQ702863\_China\_\_HeZe\_Shandong  
>JF301667\_China\_\_Jining\_Shandong\_province  
>JF301668\_China\_\_Qingdao\_Shandong\_province  
>JF414236\_China\_\_Taian\_of\_Shandong\_province  
>JF414237\_China\_\_Henan  
>JF451352\_Kuwait  
>JF727878\_China\_\_Shijiazhuang\_Hebei\_province  
>JF817218\_China\_\_Shijiazhuang\_Hebei\_province  
>JF833036\_China\_\_Langfang\_Hebei\_province  
>JF964959\_China\_\_Quzhou\_Handan\_Hebei\_province  
>JN183873\_South\_Korea\_\_Damyang  
>JN183874\_South\_Korea\_\_Damyang  
>JN183875\_South\_Korea\_\_Damyang  
>JN183876\_South\_Korea\_\_Damyang  
>JN183877\_South\_Korea\_\_Gongju  
>JN183878\_South\_Korea\_\_Okcheon  
>JN183879\_South\_Korea\_\_Andong  
>JN412854\_China\_\_Shanxi\_Province  
>JN604484\_Oman  
>JN604485\_Oman  
>JN604486\_Oman  
>JN604487\_Oman  
>JN604488\_Oman  
>JN680149\_South\_Korea  
>JN680353\_Mexico  
>JN859134\_Portugal  
>JN859135\_Portugal  
>JN859136\_Portugal  
>JN859137\_Portugal  
>JN859138\_Portugal  
>JN990922\_China\_\_Baoding\_of\_Hebei\_Province  
>JN990923\_China\_\_Langfang\_of\_Hebei\_Province  
>JN990924\_China\_\_Hebi\_Junxian\_of\_Henan\_Province

>JN990925\_China\_\_Puyang\_of\_Henan\_Province  
>JN990926\_China\_\_Zhengzhou\_of\_Henan\_Province  
>JN990927\_China\_\_Jinan\_Shandong  
>JN990928\_China\_\_Laiwu\_of\_Shandong\_Province  
>JQ004028\_China\_\_Henan\_Zhengzhou  
>JQ004045\_China\_\_Baoding\_Dingzhou\_Hebei\_province  
>JQ004046\_China\_\_Cangzhou\_Qingxian\_Hebei\_province  
>JQ004047\_China\_\_Hengshui\_Raoyang\_Hebei\_province  
>JQ004048\_China\_\_Xinxiang\_Huojia\_Henan\_province  
>JQ004049\_China\_\_Kaifeng\_Henan\_province  
>JQ004050\_China\_\_Puyang\_Hebei\_province  
>JQ004051\_China\_\_Zhengzhou\_Shangjie\_of\_Shandong\_province  
>JQ004052\_China\_\_Jiaozuo\_Xiuwu\_Henan\_province  
>JQ013089\_South\_Korea  
>JQ013090\_South\_Korea  
>JQ013091\_South\_Korea  
>JQ034613\_China\_\_Henan\_Province\_Anyang\_Henan\_province  
>JQ038232\_China\_\_Yongqing\_Hebei\_province  
>JQ038233\_China\_\_Macun\_Henan\_province  
>JQ038234\_China\_\_Qingfeng\_Henan\_province  
>JQ038235\_China\_\_Qixian\_Henan\_province  
>JQ038236\_China\_\_Tangyin\_Henan\_province  
>JQ038237\_China\_\_Weihui\_Henan\_province  
>JQ038238\_China\_\_Wuzhi\_Henan\_province  
>JQ038239\_China\_\_Xinxiang\_Henan\_province  
>JQ038240\_China\_\_Changle\_Shandong\_province  
>JQ231214\_Iran  
>JQ303121\_Mexico  
>JQ326957\_China  
>JQ354991\_Iraq  
>JQ414025\_Iran  
>JQ807735\_China\_\_Kashi\_Xinjiang  
>JQ867092\_China  
>JQ928346\_Iran\_\_Birjand\_South\_Khorasan\_province  
>JQ928347\_Iran  
>JQ928348\_Iran\_\_Dargaz\_Khorasan\_Razavi\_province  
>JX070042\_China\_\_Jinan\_Shandong  
>JX070043\_China  
>JX070044\_China\_\_Linyi\_Shandong  
>JX070045\_China\_\_Heze\_Shandong  
>JX131286\_Jordan  
>JX444575\_Jordan  
>JX456637\_China

>JX456638\_China  
>JX456639\_China  
>JX456640\_China  
>JX456641\_China  
>JX456642\_China  
>JX456643\_China  
>JX456644\_China  
>JX669541\_China\_\_Cangshan\_Shandong\_province  
>JX669542\_China\_\_Feixian\_Shandong\_province  
>JX669543\_China\_\_Mengyin\_Shandong\_province  
>JX669544\_China\_\_Yantai\_Shandong\_province  
>JX675237\_China  
>JX856172\_China\_\_Taian\_Shandong\_province  
>JX856173\_China\_\_Tengzhou\_Shandong\_province  
>JX910534\_China  
>JX961665\_South\_Korea  
>JX961666\_South\_Korea  
>JX961667\_South\_Korea  
>JX961668\_South\_Korea  
>JX961669\_South\_Korea  
>KC106635\_Iran\_\_Bojnurd  
>KC106636\_Iran\_\_Bojnurd  
>KC106637\_Iran\_\_Bojnurd  
>KC106638\_Iran\_\_Bojnurd  
>KC106641\_Iran\_\_Bojnurd  
>KC106643\_Iran\_\_Bojnurd  
>KC106645\_Iran\_\_Bojnurd  
>KC106646\_Iran\_\_Bojnurd  
>KC106648\_Iran\_\_Bojnurd  
>KC106649\_Iran\_\_Bojnurd  
>KC106650\_Iran\_\_Bojnurd  
>KC106651\_Iran\_\_Bojnurd  
>KC106652\_Iran\_\_Bojnurd  
>KC138543\_China  
>KC138544\_China  
>KC138545\_China  
>KC138546\_China  
>KC211184\_China\_\_Shouguang\_Shandong  
>KC312655\_China\_\_AnHui\_BengBu  
>KC312656\_China\_\_AnHui\_HeFei  
>KC312657\_China\_\_HeBei\_ShiJiazhuang  
>KC312658\_China\_\_HeBei\_TangShan  
>KC312659\_China\_\_HuBei\_WuHan

>KC312660\_China\_\_HuBei\_WuHan  
>KC312661\_China\_\_HeNan\_ZhengZhou  
>KC312662\_China\_\_JiangSu\_NanJing  
>KC312663\_China\_\_JiangSu\_NanTong  
>KC312664\_China\_\_ShanDong\_liaoCheng  
>KC312665\_China\_\_ShanDong\_ShouGuang  
>KC312666\_China\_\_Shandong\_weifang  
>KC312667\_China  
>KC312668\_China\_\_ShangHai  
>KC312669\_China\_\_ShanXi\_XiAn  
>KC312670\_China\_\_ShanXi\_XiAn  
>KC312671\_China\_\_ZheJiang\_HangZhou  
>KC312672\_China\_\_ZheJiang\_JiaXing  
>KC312673\_China\_\_ZheJiang\_NingBo  
>KC428753\_China\_\_Kashi\_Xinjiang  
>KC677732\_Japan  
>KC702796\_China\_\_Changli\_Heibei\_province  
>KC702797\_China\_\_Funing\_Hebei\_province  
>KC702798\_China\_\_Songyuan\_Jilin\_province  
>KC845301\_Saudi\_Arabia  
>KC852147\_China\_\_Shandong\_Shouguang  
>KC852149\_China\_\_Shandong\_Shouguang  
>KC852150\_China\_\_Shandong\_Shouguang  
>KC852151\_China\_\_Shandong\_Shouguang  
>KC999844\_China\_\_Weifang\_Shandong\_Province  
>KC999845\_China\_\_Weifang\_Shandong\_Province  
>KC999846\_China\_\_Weifang\_Shandong\_Province  
>KC999847\_China\_\_Weifang\_Shandong\_Province  
>KC999848\_China\_\_Weifang\_Shandong\_Province  
>KC999849\_China\_\_Weifang\_Shandong\_Province  
>KC999850\_China\_\_Weifang\_Shandong\_Province  
>KC999851\_China\_\_Shouguang  
>KF225312\_South\_Korea  
>KF229721\_Oman\_\_Sohar  
>KF229722\_Oman\_\_Liwa  
>KF229723\_Oman\_\_Barka  
>KF229726\_Oman\_\_Barka  
>KF435136\_Saudi\_Arabia  
>KF435137\_Saudi\_Arabia  
>KF444467\_Saudi\_Arabia  
>KF477277\_Venezuela  
>KF533855\_Costa\_Rica  
>KF533856\_Costa\_Rica

>KF533857\_Costa\_Rica  
>KF561125\_Saudi\_Arabia  
>KF612971\_China  
>KF906542\_China  
>KF990604\_China\_\_Guangdong  
>KJ125410\_China\_\_Beijing  
>KJ125411\_China\_\_Beijing  
>KJ140787\_China  
>KJ140788\_China  
>KJ546418\_China\_\_Shandong\_Shouguang  
>NC\_003803\_SACMV  
>NC\_003828\_Sardinia  
>AF155806\_SACMV  
>AJ575560\_SACMV\_ZW  
>KJ888031\_SACMV\_MG-MG529B2-11  
>KJ887935\_SACMV\_MG-MG143A5-09  
>KJ888044\_SACMV\_MG-MG571A1-11  
>gi|685877403|gb|KJ887967.1| South African cassava mosaic virus isolate MG:MG250A1:10 segment A, complete sequence  
>gi|685876722|gb|KJ887868.1| South African cassava mosaic virus isolate MG:MG50A1:06 segment A, complete sequence  
>gi|685877946|gb|KJ888045.1| South African cassava mosaic virus isolate MG:MG573A1:11 segment A, complete sequence  
>gi|685877932|gb|KJ888043.1| South African cassava mosaic virus isolate MG:MG570A3:11 segment A, complete sequence  
>gi|685877835|gb|KJ888029.1| South African cassava mosaic virus isolate MG:MG521A1:11 segment A, complete sequence  
>gi|685877828|gb|KJ888028.1| South African cassava mosaic virus isolate MG:MG516A1:11 segment A, complete sequence  
>gi|685877758|gb|KJ888018.1| South African cassava mosaic virus isolate MG:MG471A1:11 segment A, complete sequence  
>gi|685877710|gb|KJ888011.1| South African cassava mosaic virus isolate MG:MG411A1:11 segment A, complete sequence  
>gi|685877703|gb|KJ888010.1| South African cassava mosaic virus isolate MG:MG411:06 segment A, complete sequence  
>gi|685877626|gb|KJ887999.1| South African cassava mosaic virus isolate MG:MG369A2:11 segment A, complete sequence  
>gi|685877605|gb|KJ887996.1| South African cassava mosaic virus isolate MG:MG347A1:11 segment A, complete sequence  
>gi|685877226|gb|KJ887941.1| South African cassava mosaic virus isolate MG:MG175A3:09 segment A, complete sequence  
>gi|685877144|gb|KJ887929.1| South African cassava mosaic virus isolate MG:MG137A3:09 segment A, complete sequence  
>gi|685877055|gb|KJ887916.1| South African cassava mosaic virus isolate MG:MG122A2:09 segment A, complete sequence  
>gi|685877048|gb|KJ887915.1| South African cassava mosaic virus isolate MG:MG120A3:09 segment

A, complete sequence

>gi|685876873|gb|KJ887890.1| South African cassava mosaic virus isolate MG:MG71A1:06 segment A, complete sequence  
>gi|685876680|gb|KJ887862.1| South African cassava mosaic virus isolate MG:MG45A10:06 segment A, complete sequence  
>gi|685877424|gb|KJ887970.1| South African cassava mosaic virus isolate MG:MG273A8:10 segment A, complete sequence  
>gi|685877591|gb|KJ887994.1| South African cassava mosaic virus isolate MG:MG343A7:11 segment A, complete sequence  
>gi|685877905|gb|KJ888039.1| South African cassava mosaic virus isolate MG:MG560A1:11 segment A, complete sequence  
>gi|685877640|gb|KJ888001.1| South African cassava mosaic virus isolate MG:MG379A6:11 segment A, complete sequence  
>gi|685876620|gb|KJ887853.1| South African cassava mosaic virus isolate MG:MG37A3:06 segment A, complete sequence  
>gi|685877731|gb|KJ888014.1| South African cassava mosaic virus isolate MG:MG419B2:11 segment A, complete sequence  
>gi|685877696|gb|KJ888009.1| South African cassava mosaic virus isolate MG:MG409A2:11 segment A, complete sequence  
>gi|685877584|gb|KJ887993.1| South African cassava mosaic virus isolate MG:MG342B4:11 segment A, complete sequence  
>gi|685877925|gb|KJ888042.1| South African cassava mosaic virus isolate MG:MG569A2:11 segment A, complete sequence  
>gi|685877891|gb|KJ888037.1| South African cassava mosaic virus isolate MG:MG549A1:11 segment A, complete sequence  
>gi|685877786|gb|KJ888022.1| South African cassava mosaic virus isolate MG:MG483A1:11 segment A, complete sequence  
>gi|685877556|gb|KJ887989.1| South African cassava mosaic virus isolate MG:MG338A2:10 segment A, complete sequence  
>gi|685877507|gb|KJ887982.1| South African cassava mosaic virus isolate MG:MG328A1:10 segment A, complete sequence  
>gi|685877438|gb|KJ887972.1| South African cassava mosaic virus isolate MG:MG292:06 segment A, complete sequence  
>gi|685877165|gb|KJ887932.1| South African cassava mosaic virus isolate MG:MG139A1:09 segment A, complete sequence  
>gi|685877111|gb|KJ887924.1| South African cassava mosaic virus isolate MG:MG131A2:09 segment A, complete sequence  
>gi|685877076|gb|KJ887919.1| South African cassava mosaic virus isolate MG:MG125A1:09 segment A, complete sequence  
>gi|685876743|gb|KJ887871.1| South African cassava mosaic virus isolate MG:MG52C1:06 segment A, complete sequence  
>gi|685876436|gb|KJ887826.1| South African cassava mosaic virus isolate MG:MG6A1:05 segment A, complete sequence  
>gi|685877745|gb|KJ888016.1| South African cassava mosaic virus isolate MG:MG449A3:11 segment A, complete sequence  
>gi|685877675|gb|KJ888006.1| South African cassava mosaic virus isolate MG:MG403A4:11 segment A, complete sequence  
>gi|685877431|gb|KJ887971.1| South African cassava mosaic virus isolate MG:MG275A3:10 segment

A, complete sequence

>gi|685877062|gb|KJ887917.1| South African cassava mosaic virus isolate MG:MG123B3:09 segment A, complete sequence

>gi|685877884|gb|KJ888036.1| South African cassava mosaic virus isolate MG:MG545A3:11 segment A, complete sequence

>gi|685877863|gb|KJ888033.1| South African cassava mosaic virus isolate MG:MG533A1:11 segment A, complete sequence

>gi|685877821|gb|KJ888027.1| South African cassava mosaic virus isolate MG:MG512A2:11 segment A, complete sequence

>gi|685877814|gb|KJ888026.1| South African cassava mosaic virus isolate MG:MG503B1:11 segment A, complete sequence

>gi|685877563|gb|KJ887990.1| South African cassava mosaic virus isolate MG:MG339A1:10 segment A, complete sequence

>gi|685876396|gb|KJ887820.1| South African cassava mosaic virus isolate MG:MG1A3:06 segment A, complete sequence

>gi|685877654|gb|KJ888003.1| South African cassava mosaic virus isolate MG:MG400A4:11 segment A, complete sequence

>gi|685878008|gb|KJ888054.1| South African cassava mosaic virus isolate MG:MG594A1:11 segment A, complete sequence

>gi|685877807|gb|KJ888025.1| South African cassava mosaic virus isolate MG:MG492A4:11 segment A, complete sequence

>gi|685877772|gb|KJ888020.1| South African cassava mosaic virus isolate MG:MG474A6:11 segment A, complete sequence

>gi|685877647|gb|KJ888002.1| South African cassava mosaic virus isolate MG:MG398A1:11 segment A, complete sequence

>gi|685877549|gb|KJ887988.1| South African cassava mosaic virus isolate MG:MG337A1:10 segment A, complete sequence

>gi|685877542|gb|KJ887987.1| South African cassava mosaic virus isolate MG:MG336A5:10 segment A, complete sequence

>gi|685877528|gb|KJ887985.1| South African cassava mosaic virus isolate MG:MG334A3:10 segment A, complete sequence

>gi|685877233|gb|KJ887942.1| South African cassava mosaic virus isolate MG:MG176A3:09 segment A, complete sequence

>gi|685877192|gb|KJ887936.1| South African cassava mosaic virus isolate MG:MG146A1:09 segment A, complete sequence

>gi|685877118|gb|KJ887925.1| South African cassava mosaic virus isolate MG:MG133A8:09 segment A, complete sequence

>gi|685876887|gb|KJ887892.1| South African cassava mosaic virus isolate MG:MG73A1:06 segment A, complete sequence

>gi|685876729|gb|KJ887869.1| South African cassava mosaic virus isolate MG:MG51A1:06 segment A, complete sequence

>gi|685876660|gb|KJ887859.1| South African cassava mosaic virus isolate MG:MG44A1:06 segment A, complete sequence

>gi|685876443|gb|KJ887827.1| South African cassava mosaic virus isolate MG:MG7A33:05 segment A, complete sequence

>gi|685877125|gb|KJ887926.1| South African cassava mosaic virus isolate MG:MG134A2:09 segment A, complete sequence

>gi|685877717|gb|KJ888012.1| South African cassava mosaic virus isolate MG:MG414A1:11 segment

A, complete sequence

>gi|685877130|gb|KJ887927.1| South African cassava mosaic virus isolate MG:MG135A2:09 segment A, complete sequence

>gi|685878281|gb|KJ888094.1| South African cassava mosaic virus isolate MG:MG718A2:11 segment A, complete sequence

>gi|685878253|gb|KJ888090.1| South African cassava mosaic virus isolate MG:MG694A7:11 segment A, complete sequence

>gi|685878246|gb|KJ888089.1| South African cassava mosaic virus isolate MG:MG694A4:11 segment A, complete sequence

>gi|685877994|gb|KJ888052.1| South African cassava mosaic virus isolate MG:MG584A4:11 segment A, complete sequence

>gi|685877911|gb|KJ888040.1| South African cassava mosaic virus isolate MG:MG561A2:11 segment A, complete sequence

>gi|685877577|gb|KJ887992.1| South African cassava mosaic virus isolate MG:MG341A1:10 segment A, complete sequence

>gi|685877521|gb|KJ887984.1| South African cassava mosaic virus isolate MG:MG333A1:10 segment A, complete sequence

>gi|685876532|gb|KJ887840.1| South African cassava mosaic virus isolate MG:MG20A1:06 segment A, complete sequence

>gi|685877800|gb|KJ888024.1| South African cassava mosaic virus isolate MG:MG491A8:11 segment A, complete sequence

>gi|685877793|gb|KJ888023.1| South African cassava mosaic virus isolate MG:MG490A3:11 segment A, complete sequence

>gi|685877779|gb|KJ888021.1| South African cassava mosaic virus isolate MG:MG475A3:11 segment A, complete sequence

>gi|685877765|gb|KJ888019.1| South African cassava mosaic virus isolate MG:MG473A2:11 segment A, complete sequence

>gi|685877751|gb|KJ888017.1| South African cassava mosaic virus isolate MG:MG467A1:11 segment A, complete sequence

>gi|685877738|gb|KJ888015.1| South African cassava mosaic virus isolate MG:MG420B3:11 segment A, complete sequence

>gi|685877417|gb|KJ887969.1| South African cassava mosaic virus isolate MG:MG262A2:10 segment A, complete sequence

>gi|685877158|gb|KJ887931.1| South African cassava mosaic virus isolate MG:MG138B1:09 segment A, complete sequence

>gi|685877090|gb|KJ887921.1| South African cassava mosaic virus isolate MG:MG127A1:09 segment A, complete sequence

>gi|685876606|gb|KJ887851.1| South African cassava mosaic virus isolate MG:MG32B1:06 segment A, complete sequence

>gi|685877069|gb|KJ887918.1| South African cassava mosaic virus isolate MG:MG124A3:09 segment A, complete sequence

>gi|685878302|gb|KJ888097.1| South African cassava mosaic virus isolate MG:MG730A4:11 segment A, complete sequence

>gi|685878288|gb|KJ888095.1| South African cassava mosaic virus isolate MG:MG729A3:11 segment A, complete sequence

>gi|685878066|gb|KJ888063.1| South African cassava mosaic virus isolate MG:MG624A4:11 segment A, complete sequence

>gi|685877535|gb|KJ887986.1| South African cassava mosaic virus isolate MG:MG335A6:10 segment

A, complete sequence

>gi|685877362|gb|KJ887961.1| South African cassava mosaic virus isolate MG:MG238A1:10 segment

A, complete sequence

>gi|685877301|gb|KJ887952.1| South African cassava mosaic virus isolate MG:MG209A2:09 segment

A, complete sequence

>gi|685877178|gb|KJ887934.1| South African cassava mosaic virus isolate MG:MG142A3:09 segment

A, complete sequence

>X76319\_Israel

>Z83256\_EACMV\_Tanzania
